# Supplementary material for: Acupuncture for Chronic Radiation-Induced Xerostomia in Head and Neck Cancer: A Multicenter Randomized Clinical Trial
Source: PubMed Central journal article supplement (PMC11091764; doi:10.1001/jamanetworkopen.2024.10421), 2024-05-13
Supplement: jamanetwopen-e2410421-s002.pdf [file jamanetwopen-e2410421-s002.pdf]

## Supplementary Online Content

Cohen L, Danhauer SC, Garcia MK, et al. Effectiveness of acupuncture for chronic radiation-induced xerostomia in head and neck cancer: a randomized clinical trial. *JAMA Netw Open*. 2024;7(5):e2410421. doi:10.1001/jamanetworkopen.2024.10421

**eTable 1.** Raw Means and Standard Deviations for All Outcomes Listed by Treatment Group and Time

**eTable 2.** Multiple Imputation Sensitivity Analysis for Least Square Mean Estimates With 95% Confidence Intervals for Each Treatment Group by Time

This supplementary material has been provided by the authors to give readers additional information about their work.

**eTable 1. Raw means and standard deviations for all outcomes listed by treatment group and time.**

|              |           | Combined     | TA           | SA           | SOH         |
|--------------|-----------|--------------|--------------|--------------|-------------|
| Raw Scores   | Time Week | Mean (SD)    | Mean (SD)    | Mean (SD)    | Mean (SD)   |
| XQ score     | 0         | 62.7 (17.1)  | 63.0 (17.1)  | 62.1 (17.5)  | 63.2 (16.8) |
|              | 4         | 54.0 (18.6)  | 51.1 (19.2)  | 54.5 (18.5)  | 57.3 (17.5) |
|              | 8         | 51.1 (19.9)  | 48.3 (20.4)  | 50.8 (20.2)  | 54.8 (18.6) |
|              | 12        | 50.7 (21.2)  | 48.6 (23.0)  | 49.1 (20.8)  | 54.6 (19.2) |
|              | 26        | 49.7 (20.5)  | 48.7 (21.5)  | 47.5 (21.1)  | 53.3 (18.4) |
| Fact-G Total | 0         | 97.1 (15.5)  | 98.8 (15.5)  | 97.7 (15.1)  | 94.8 (15.9) |
|              | 4         | 99.8 (14.4)  | 101.9 (14.3) | 100.1 (13.5) | 96.4 (15.1) |
|              | 8         | 100.5 (13.2) | 102.6 (13.1) | 100.0 (12.2) | 98.6 (14.4) |
|              | 12        | 99.1 (14.2)  | 103.4 (11.8) | 97.8 (13.2)  | 95.5 (16.6) |
|              | 26        | 100.3 (14.6) | 102.0 (14.2) | 99.7 (14.5)  | 98.8 (15.2) |
| AES Score    | 0         | 12.1 (4.0)   | 11.9 (4.1)   | 11.7 (3.7)   | 12.7 (4.3)  |
|              | 4         | 10.7 (4.2)   | 10.8 (4.3)   | 10.6 (4.1)   | n/a**       |

TA = True Acupuncture; SA = Sham Acupuncture; SOH = Standard Oral Hygiene; XQ = Xerostomia Questionnaire; AES = Acupuncture Expectancy Scale

\*\*AES Scores were not collected for SOH treatment group at week 4 per protocol

**eTable 2. Multiple imputation sensitivity analysis for least square mean estimates with 95% confidence intervals for each treatment group by time**

|                     | ..        | TA                    | SA                   | SOH                  | Pairwise Comparisons |                     |                    |
|---------------------|-----------|-----------------------|----------------------|----------------------|----------------------|---------------------|--------------------|
| ..                  | Time Week | LS Mean<br>95% CI     | LS Mean<br>95% CI    | LS Mean<br>95% CI    | TA v SOH<br>p-value  | SA v SOH<br>p-value | TA v SA<br>p-value |
| <b>XQ Score</b>     | 4         | 51.1<br>(47.9,54.3)   | 54.9<br>(51.5,58.3)  | 56.5<br>(52.8,60.3)  | 0.03                 | 0.51                | 0.12               |
|                     | 8         | 49.1<br>(45.3,52.9)   | 51.6<br>(47.8,55.5)  | 55.5<br>(52.8,59.7)  | 0.05                 | 0.28                | 0.36               |
|                     | 12        | 49.2<br>(45.3,53.1)   | 50.4<br>(46.4,54.4)  | 54.2<br>(50.0,58.4)  | 0.09                 | 0.19                | 0.68               |
|                     | 26        | 49.6<br>(45.6,53.7)   | 49.1<br>(45.0,53.2)  | 53.6<br>(49.4,57.9)  | 0.18                 | 0.13                | 0.85               |
| <b>FACT-G Total</b> | 4         | 100.7<br>(98.7,102.7) | 99.7<br>(97.6,101.8) | 97.5<br>(95.1,99.9)  | 0.04                 | 0.17                | 0.49               |
|                     | 8         | 100.8<br>(98.4,103.2) | 99.5<br>(97.2,101.9) | 98.9<br>(96.3,101.5) | 0.29                 | 0.74                | 0.46               |
|                     | 12        | 101.5<br>(99.1,104.0) | 97.5<br>(95.0,99.9)  | 96.8<br>(94.2,99.4)  | 0.009                | 0.73                | 0.02               |
|                     | 26        | 100.0<br>(97.4,102.7) | 99.0<br>(96.3,101.7) | 98.9<br>(96.0,101.7) | 0.56                 | 0.95                | 0.60               |
| <b>AES Score</b>    | 4         | 10.7<br>(10.0,11.5)   | 10.9<br>(10.1,11.7)  | n/a**                | n/a**                | n/a**               | 0.75               |

Models used monotone regression with 1000 iterations and utilized baseline outcome, age, sex, race, ethnicity, and job status to impute outcomes, with an unstructured covariance.

TA = True Acupuncture; SA = Sham Acupuncture; SOH = Standard Oral Hygiene; XQ = Xerostomia Questionnaire; AES = Acupuncture Expectancy Scale;

\*\*AES Scores were not collected for SOH treatment group at week 4 per protocol
