# Supplementary material for: Acupuncture for Chronic Radiation-Induced Xerostomia in Head and Neck Cancer: A Multicenter Randomized Clinical Trial
Source: PubMed Central journal article supplement (PMC11091764; doi:10.1001/jamanetworkopen.2024.10421), 2024-05-13
Supplement: jamanetwopen-e2410421-s003.pdf [file jamanetwopen-e2410421-s003.pdf]

## Data Sharing Statement

Cohen. Acupuncture for Chronic Radiation-Induced Xerostomia in Head and Neck Cancer. *JAMA Netw Open*. Published May 13, 2024. doi:10.1001/jamanetworkopen.2024.10421

### Data

**Data available:** Yes

**Data types:** Deidentified participant data

**How to access data:** Wake Forest NCORP

**When available:** With publication

### Supporting Documents

**Document types:** None

### Additional Information

**Who can access the data:** researchers whose proposed use of the data has been approved

**Types of analyses:** for any purpose or for a specified purpose outside the scope of the trial

**Mechanisms of data availability:** with a signed data access agreement
